# Supplementary material
Source: publisher figshare collection journal article supplement (https://acs.figshare.com/ndownloader/files/4715293)
Supplement: Supplementary file 1 [file 4715293]

## Supporting Information for

# A Ternary Complex Consisting of DNA, Polycation, and a Natural Polysaccharide of Schizophyllan to Induce Cellular Uptake by APCs

*Yoichi Takeda,<sup>†</sup> Naohiko Shimada,<sup>†</sup> Kenji Kaneko,<sup>‡</sup> Seiji Shinkai,<sup>‡</sup> and Kazuo Sakurai.<sup>\*,†</sup>*

Department of Chemical Processes & Environments, The University of Kitakyushu, 1-1 Hibikino,  
Wakamatu-ku, Kitakyushu, Fukuoka 808-0135, Japan, and Department of Chemistry and Biochemistry,  
Graduate School of Engineering, Kyushu University, Fukuoka 819-0395, Japan.

AUTHOR EMAIL ADDRESS sakurai@env.kitakyu-u.ac.jp

\*Corresponding\_author. Email: sakurai@env.kitakyu-u.ac.jp. Tel: +81-93-695-3298. Fax: +81-93-695-3390.

Figure S1.

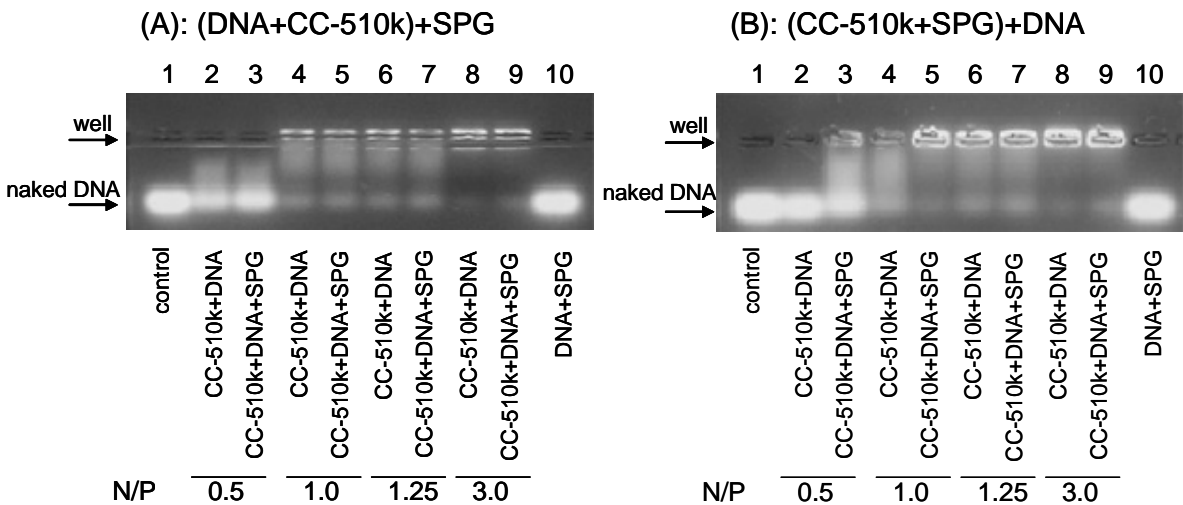

Figure S1. Changes of the gel electrophoresis patterns when N/P ratio was decreased, comparing the polycation/DNA systems and the ternary polycation/DNA+SPG mixtures. (A) DNA and CC-510k were first mixed and then SPG was added. (B) SPG and CC-510k were first mixed and then DNA was added.

Figure S1 shows the gel electrophoresis pattern when DNA and CC-510k were first mixed (A) and when SPG and CC-510k were first mixed (B). The well positions and the naked-DNA bands are indicated by arrows. When compared the lane 5 (N/P = 1.0) between (A) and (B), it seems that most DNA is present at the well when SPG and CC-510k were first mixed, on the other hand, there is a broad band observed when DNA and CC-510k were first mixed. These data indicate the necessity that SPG exist in the system before formation of the polyion complex of DNA and CC-510k, because large aggregation of the polyion complex would be formed when DNA and CC-510k were first mixed. Therefore, we selected the third method.

Figure S2.

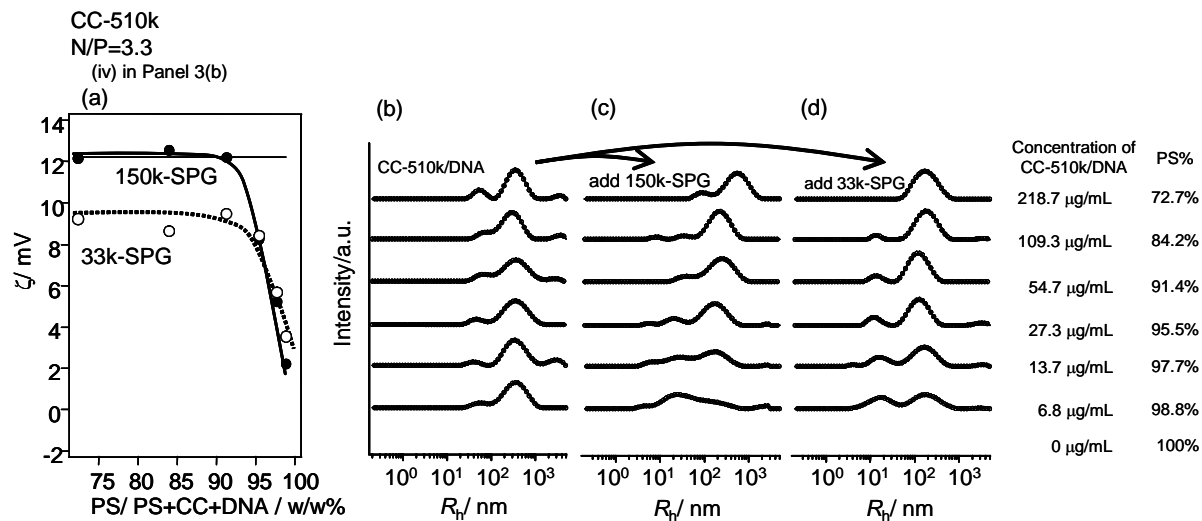

Figure S2. The polysaccharide composition (PS%) dependence of  $\zeta$  for the ternary mixtures and changes of the particle size distribution upon mixing with 150k-SPG or 33k-SPG for the CC-510k/DNA systems at  $N/P = 3.3$ . Each curve lining up sideways at the same height has the same CC-510k/DNA concentration as presented at the right side.

Figure S3.

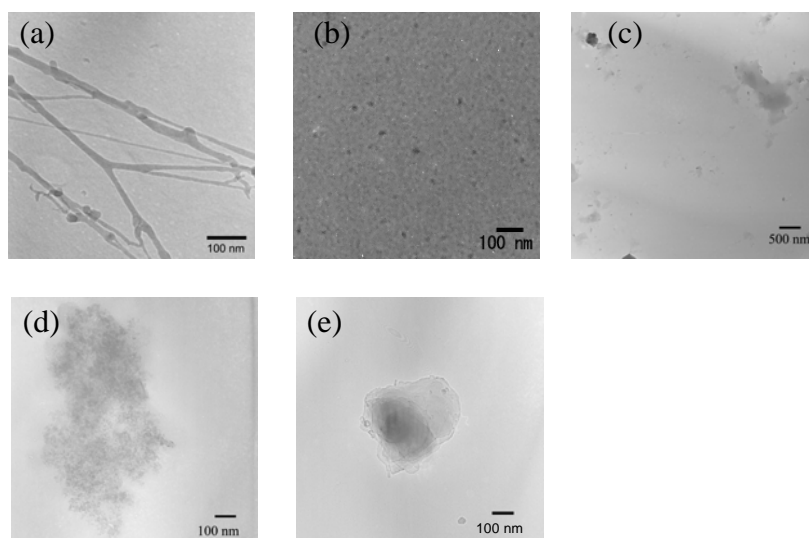

Figure S3. TEM images of SPG (a), DNA (b), CC-510k (c), CC-510k/DNA complex (d), and DNA/CC-510k/SPG (e).
